# Supplementary material for: On the Low-Lying Electronically Excited States of Azobenzene Dimers: Transition Density Matrix Analysis
Source: Preprints.org preprint supplement (doi:10.20944/preprints202106.0498.v1), 2021-06-21
Supplement: Supplementary file 1 [file supplementary]

*Supporting Information for*  
On the low-lying electronically excited states of azobenzene dimers:  
Transition density matrix analysis

Evgenii Titov\*

*Theoretical Chemistry, Institute of Chemistry, University of Potsdam,  
Karl-Liebknecht-Straße 24-25, 14476 Potsdam, Germany*

\*[titov@uni-potsdam.de](mailto:titov@uni-potsdam.de)

Table S1: Vertical excitation energies in eV and oscillator strengths (in parentheses) of the lowest ten electronic transitions of the cofacial  $\pi$ -stacked azobenzene dimer  $d = 3.5$  Å calculated with TD- $\omega$ B97X-D/6-31G\*, TD- $\omega$ B97X-D/def2-TZVP, TD- $\omega$ B97X-D/aug-cc-pVTZ, and ADC(2)/aug-cc-pVTZ. The dimer geometry is constructed from the B3LYP/def2-TZVP optimized monomer geometry. The bright transitions are shown in bold.

|                          | TD- $\omega$ B97X-D/6-31G* | TD- $\omega$ B97X-D/def2-TZVP | TD- $\omega$ B97X-D/aug-cc-pVTZ | ADC(2)/aug-cc-pVTZ |
|--------------------------|----------------------------|-------------------------------|---------------------------------|--------------------|
| $S_0 \rightarrow S_1$    | 2.59 (0.00)                | 2.57 (0.00)                   | 2.57 (0.00)                     | 2.65 (0.00)        |
| $S_0 \rightarrow S_2$    | 2.63 (0.00)                | 2.63 (0.00)                   | 2.63 (0.00)                     | 2.72 (0.00)        |
| $S_0 \rightarrow S_3$    | 3.58 (0.00)                | 3.45 (0.00)                   | 3.43 (0.00)                     | 3.46 (0.00)        |
| $S_0 \rightarrow S_4$    | <b>4.32 (1.40)</b>         | <b>4.21 (1.37)</b>            | <b>4.19 (1.36)</b>              | 4.04 (0.00)        |
| $S_0 \rightarrow S_5$    | 4.39 (0.00)                | 4.27 (0.00)                   | 4.25 (0.00)                     | 4.04 (0.00)        |
| $S_0 \rightarrow S_6$    | 4.40 (0.00)                | 4.28 (0.00)                   | 4.27 (0.00)                     | <b>4.20 (1.50)</b> |
| $S_0 \rightarrow S_7$    | 4.64 (0.00)                | 4.59 (0.00)                   | 4.58 (0.00)                     | 4.47 (0.04)        |
| $S_0 \rightarrow S_8$    | 4.69 (0.00)                | 4.66 (0.00)                   | 4.66 (0.00)                     | 4.48 (0.00)        |
| $S_0 \rightarrow S_9$    | 4.73 (0.01)                | 4.67 (0.00)                   | 4.67 (0.00)                     | 4.51 (0.00)        |
| $S_0 \rightarrow S_{10}$ | 4.81 (0.05)                | 4.73 (0.04)                   | 4.71 (0.04)                     | 4.56 (0.00)        |

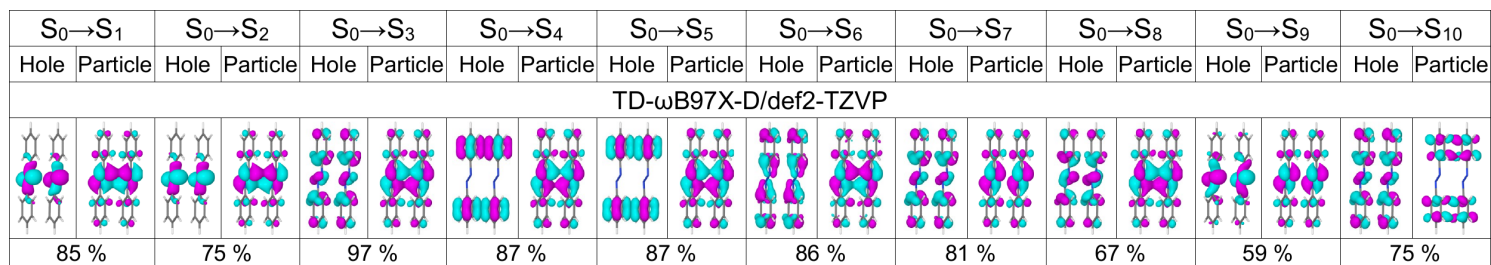

Figure S1: Dominant natural transition orbital pairs for the lowest ten transitions of  $\pi$ -stacked dimer  $d = 3.0$  Å. Calculations are performed at the TD- $\omega$ B97X-D level of theory.

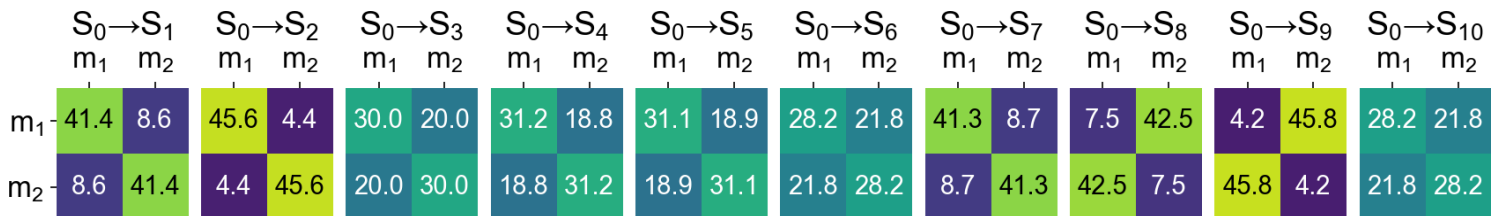

Figure S2: FTDM  ${}^5\mathbf{F}$  matrices for the lowest ten transitions of  $\pi$ -stacked dimer  $d = 3.0$  Å. Calculations are performed at the TD- $\omega$ B97X-D level of theory.
